# Supplementary material for: From quarry to carbon sink: process-based LCA modelling of lime-based construction materials for net-zero and carbon-negative transformation
Source: Royal Society of Chemistry journal article supplement (doi:10.1039/d3gc04599d), 2024-01-01
Supplement: d3gc04599d1.pdf [file d3gc04599d1.pdf]

**Supplementary Information 1 (SP1).**

European/UK projects oriented to the decarbonization of the lime industry

| <b>STRATEGY</b>               | <b>AREA</b>                    | <b>NAME</b>                                                                                                                                | <b>MAIN GOAL</b>                                                                                                                                                                                                                                 | <b>Period</b> |
|-------------------------------|--------------------------------|--------------------------------------------------------------------------------------------------------------------------------------------|--------------------------------------------------------------------------------------------------------------------------------------------------------------------------------------------------------------------------------------------------|---------------|
| CARBON<br>DIRECT<br>AVOIDANCE | ENERGY<br>EFFICIENCY           | WHEATREC4PG:<br>Waste Heat<br>Recovery for<br>Power<br>Generation<br><br>Lime: Lhoist                                                      | Recovers 4 MW of<br>thermal power<br>from a rotary kiln<br>exhaust gas, and<br>converts it to 0.5<br>MWe of low<br>carbon electrical<br>power                                                                                                    | 2012-2013     |
|                               | ENERGY<br>EFFICIENCY           | CHP<br>GENERATION:<br>Combined Heat<br>and Power<br>(CHP) for<br>Limestone<br>Milling<br><br>Lime: Carmeuse                                | Energy recovery<br>from drying /<br>heating off gases:<br>Instead using 40%<br>of natural gas'<br>thermal energy for<br>producing<br>electrical power, in<br>the combined heat<br>and power more<br>than 70% of<br>thermal energy is<br>utilized | 2014-2017     |
|                               | RENEWABLE<br>ENERGY<br>SOURCES | ENERGY<br>OPTIMIZATION:<br>Reduced<br>energy<br>consumption<br>through<br>optimized<br>processes and<br>capacity use<br><br>Lime: Nordkalk | Biogas production<br>from by-products<br>of the food<br>industry<br>slaughterhouses<br>and livestock-<br>breeding as well as<br>wastewater sludge                                                                                                | 2011-2016     |
|                               | RENEWABLE<br>ENERGY<br>SOURCES | ADIREN4LIME:<br>Anaerobic<br>Digestion as<br>Renewable<br>Energy for the<br>Lime Industry<br><br>Lime: Singleton<br>Birch                  | Production of<br>biogas from<br>biomass in<br>anaerobic<br>conditions and<br>used as fuel for the<br>lime kiln.                                                                                                                                  | 2014-2015     |
|                               | RENEWABLE<br>ENERGY            | HYDROGEN<br>FUEL ENERGY                                                                                                                    | Use of hydrogen as<br>an alternative fuel                                                                                                                                                                                                        | 2019-2022     |

|                          |                             |                                                                                                                                                             |                                                                                                                                                                    |           |
|--------------------------|-----------------------------|-------------------------------------------------------------------------------------------------------------------------------------------------------------|--------------------------------------------------------------------------------------------------------------------------------------------------------------------|-----------|
|                          | SOURCES                     | <p>INNOVATION:<br/>Alternatives to natural gas for high calcium lime manufacturing</p> <p>Lime: Mineral Products Association / British Lime Association</p> | for high calcium lime manufacturing.                                                                                                                               |           |
|                          | RENEWABLE ENERGY SOURCES    | <p>BIOXYSORB:<br/>Biomass co-combustion under both air- and oxy-fuel conditions</p> <p>Lime: Lhoist</p>                                                     | Emissions of 1 <sup>st</sup> and 2 <sup>nd</sup> generation biomasses, evaluation of sorbents and plant modifications for high thermal share biomass co-combustion | 2013-2016 |
|                          | RENEWABLE ENERGY SOURCES    | <p>ENERGY GENERATION:<br/>Largest Solar panel farm in Wallonia by a mining company</p> <p>Lime: Carmeuse</p>                                                | 13.200 solar panels will supply annually over 3.6 GWh of electricity to power lime production                                                                      | 2014-2017 |
| CARBON DIRECT SEPARATION | KILN TECHNOLOGY DEVELOPMENT | <p>LEILAC1: Low Emissions Intensity Lime and Cement</p> <p>Lime: Lhoist &amp; Tarmac</p>                                                                    | Calix's Direct Separator Reactor technology is an in-situ CO <sub>2</sub> capture technique that requires no additional chemicals or equipment                     | 2016-2021 |
|                          | KILN TECHNOLOGY SCALE UP    | <p>LEILAC2: Low Emissions Intensity Lime and Cement</p> <p>Lime: Lhoist</p>                                                                                 | X4 scale-up of LEILAC1 and upgrade into dual mode electricity/natural gas potentially balancing services to the grid                                               | 2020-2025 |

|                 |                             |                                                                   |                                                                                                                                                                                                                                            |           |
|-----------------|-----------------------------|-------------------------------------------------------------------|--------------------------------------------------------------------------------------------------------------------------------------------------------------------------------------------------------------------------------------------|-----------|
|                 | KILN TECHNOLOGY DEVELOPMENT | ZERCAL: Zero-Carbon Lime pilot plant<br><br>Lime: Singleton Birch | New oxy-fuel flash calcination process able to capture all CO <sub>2</sub> from lime production (lime decomposition and fuel combustion)                                                                                                   | 2021-2024 |
|                 | KILN TECHNOLOGY DEVELOPMENT | Butterfly Project<br><br>Lime: Carmeuse                           | A new type of kiln designed to effectively capture and concentrate CO <sub>2</sub> released during lime production                                                                                                                         | 2023 -    |
|                 | KILN TECHNOLOGY DEVELOPMENT | EVEREST project<br><br>Lime: Lhoist                               | Improved calcination and carbon capture for the largest lime plant in Europe                                                                                                                                                               | 2023-     |
| CO2 VALUE CHAIN | CARBON USE                  | COLUMBUS: Power to Methane<br>Lime: Carmeuse                      | Transforming CO <sub>2</sub> generated during the lime production process and hydrogen into e-methane, a renewable gas that can be injected into the gas network or used to power vehicles and industry. Pure CO <sub>2</sub> is required. | 2022-2025 |
|                 | CARBON USE                  | LOWCO <sub>2</sub><br><br>Lime: Calcinor                          | Incorporating CO <sub>2</sub> to alkaline residues (slags of energy plants, slags of steel mills, residues of RCDs construction and demolition and to produce methane/methanol                                                             | 2019-2022 |
|                 | CARBON USE                  | NKL: Neutral Kero Lime<br><br>Lime: Lhoist                        | innovative e-Kerosene process using CO <sub>2</sub> from a lime kiln and hydrogen                                                                                                                                                          | 2022-2026 |

|  |                |                                                             |                                                                                                                                                                                                                                                                        |           |
|--|----------------|-------------------------------------------------------------|------------------------------------------------------------------------------------------------------------------------------------------------------------------------------------------------------------------------------------------------------------------------|-----------|
|  |                |                                                             | produced from green electricity via the Fischer Tropsch process                                                                                                                                                                                                        |           |
|  | CARBON STORAGE | CSM: Carbon Storage by Mineralization<br><br>Lime: Nordkalk | A rock composed mainly of magnesium silicate mineral serpentine reacts with the CO <sub>2</sub> to form a stable compound, thus fixing the CO <sub>2</sub> permanently.<br><br>Direct mineralisation of flue gas instead of separated and compressed CO <sub>2</sub> . | 2011-2016 |

**Supplementary Information 2 (SP2).**

Providers of Energy Source for Electricity Production Germany 2020 and 2050. Based on [11].

|      | Flow                        | Amount (kWh) | Description   | Provider                                                                                                                                      |
|------|-----------------------------|--------------|---------------|-----------------------------------------------------------------------------------------------------------------------------------------------|
| 2020 | electricity, high voltage   | 9            | Biofuels      | heat and power co-generation, biogas, gas engine   electricity, high voltage   APOS, S - DE                                                   |
|      | electricity, high voltage   | 4            | Wind Offshore | electricity production, wind, 1-3MW turbine, offshore   electricity, high voltage   APOS, S - DE                                              |
|      | electricity, high voltage   | 4            | Hydro         | electricity production, hydro, pumped storage   electricity, high voltage   APOS, S - DE                                                      |
|      | electricity, high voltage   | 18           | Wind Onshore  | electricity production, wind, 1-3MW turbine, onshore   electricity, high voltage   APOS, S - DE                                               |
|      | electricity, high voltage   | 25           | Coal          | electricity production, hard coal   electricity, high voltage   APOS, S - DE                                                                  |
|      | electricity, high voltage   | 17           | Natural gas   | electricity production, natural gas, conventional power plant   electricity, high voltage   APOS, S - DE                                      |
|      | electricity, high voltage   | 11           | Nuclear       | electricity production, nuclear, pressure water reactor   electricity, high voltage   APOS, S - DE                                            |
|      | electricity, high voltage   | 1            | Oil           | electricity production, oil   electricity, high voltage   APOS, S - DE                                                                        |
|      | electricity, high voltage   | 9            | Solar         | electricity production, solar thermal parabolic trough, 50 MW   electricity, high voltage   APOS, S - RoW                                     |
|      | electricity, medium voltage | 2            | Waste         | electricity, from municipal waste incineration to generic market for electricity, medium voltage   electricity, medium voltage   APOS, S - DE |
| 2050 | electricity, high voltage   | 3            | Biofuels      | heat and power co-generation, biogas, gas engine   electricity, high voltage   APOS, S - DE                                                   |
|      | electricity, high voltage   | 7            | Geothermal    | electricity production, deep geothermal   electricity, high voltage   APOS, S - DE                                                            |
|      | electricity, high voltage   | 26           | Wind Offshore | electricity production, wind, 1-3MW turbine, offshore   electricity, high voltage   APOS, S - DE                                              |
|      | electricity, high voltage   | 34           | Solar         | electricity production, solar tower power plant, 20 MW   electricity, high voltage   APOS, S - RoW                                            |
|      | electricity, high voltage   | 4            | Hydro         | electricity production, hydro, pumped storage   electricity, high voltage   APOS, S - DE                                                      |
|      | electricity, high voltage   | 26           | Wind Onshore  | electricity production, wind, 1-3MW turbine, onshore   electricity, high voltage   APOS, S - DE                                               |

Providers of Energy Source for Fuel Production Germany 2020 and 2050. Based on [11].

|      | Flow                                | Amount (MJ) | Description | Provider                                      |
|------|-------------------------------------|-------------|-------------|-----------------------------------------------|
| 2020 | heat, district or industrial, other | 2           | Biomass     | heat production, wood chips from industry, at |

|      |                                                                                                                                                                         |    |                    |                                                                                                                                                                                         |
|------|-------------------------------------------------------------------------------------------------------------------------------------------------------------------------|----|--------------------|-----------------------------------------------------------------------------------------------------------------------------------------------------------------------------------------|
|      | than natural gas                                                                                                                                                        |    |                    | furnace 1000kW   heat, district or industrial, other than natural gas   APOS, S - DE                                                                                                    |
|      | heat, district or industrial, other than natural gas                                                                                                                    | 5  | Oil                | heat production, heavy fuel oil, at industrial furnace 1MW   heat, district or industrial, other than natural gas   APOS, S - Europe without Switzerland                                |
|      | heat, district or industrial, other than natural gas                                                                                                                    | 8  | Waste              | heat, from municipal waste incineration to generic market for heat district or industrial, other than natural gas   heat, district or industrial, other than natural gas   APOS, S - DE |
|      | Heat, district or industrial, natural gas {Europe without Switzerland}  heat production, natural gas, at industrial furnace >100kW   Cut-off                            | 34 | Natural gas        | heat production, natural gas, at industrial furnace >100kW - Europe without Switzerland                                                                                                 |
|      | Heat, district or industrial, other than natural gas {Europe without Switzerland}  heat production, at hard coal industrial furnace 1-10MW   Cut-off                    | 51 | Fossil Solid Fuels | heat production, at hard coal industrial furnace 1-10MW - Europe without Switzerland                                                                                                    |
|      |                                                                                                                                                                         |    |                    |                                                                                                                                                                                         |
| 2050 | Heat, district or industrial, natural gas {Europe without Switzerland}  heat production, natural gas, at industrial furnace >100kW   Cut-off, S - Copied from Ecoinvent | 60 | Natural gas        | heat production, natural gas, at industrial furnace >100kW - Europe without Switzerland                                                                                                 |
|      | heat, district or industrial, other than natural gas                                                                                                                    | 32 | Biomass            | heat production, wood chips from industry, at furnace 1000kW   heat, district or industrial, other than natural gas   APOS, S - DE                                                      |
|      | heat, district or industrial, other than natural gas                                                                                                                    | 8  | Waste              | heat, from municipal waste incineration to generic market for heat district or industrial, other than natural gas   heat, district or industrial, other than natural gas   APOS, S - DE |

### Supplementary Information 3 (SP3).

Life-cycle inventory for the production of the lime-based plaster

The LCI for the production of the lime-based plaster is shown, based on a previous study carried out by the authors [8]. The following additives are incorporated in the mix (referred

to the binder in mass proportions): 2.5% Dispersion Agent, 0.20% Water Retention Agent, 0.02% Air Entrainer, 0.3% Hydrophobic Agent. The average transportation distance per additive is 250 km.

**Table 1.** Life Cycle Inventory for the production of a lime-based plaster (based on [8])

| OPERATION                    | PROCESS MODELLED                        | PROCESSED AMOUNT |      | INVENTORY AMOUNT |         | SOURCES & NOTES                                                        |
|------------------------------|-----------------------------------------|------------------|------|------------------|---------|------------------------------------------------------------------------|
|                              |                                         | AMOUNT           | UNIT | AMOUNT           | UNIT    |                                                                        |
| <b>Plaster Manufacturing</b> |                                         |                  |      |                  |         |                                                                        |
| Input                        | <b>Fine aggregate</b>                   | 0.675            | t    | 0.675            | t       | Laveglia et al, 2023 [5]                                               |
|                              | <b>Lightweight aggregate</b>            | 0.07             | t    | 0.07             | t       | Modelled by Ecoinvent (pumice quarry operation, GLO)                   |
|                              | Transport                               | 14               | t*km | 200              | km      | Modelled by Ecoinvent (transport, lorry 16-32 metric ton, EURO6   RoW) |
|                              | Endless screw conveyor                  | 0.0003           | kWh  | 0.004            | kWh / t | Electricity mix (SUBLime designed) [10]                                |
|                              | <b>Artificial lightweight aggregate</b> | 0.005            | t    | 0.005            | t       | Modelled by Ecoinvent (expanded perlite production, GLO)               |
|                              | Transport                               | 1                | t*km | 200              | km      | Modelled by Ecoinvent (transport, lorry 16-32 metric ton, EURO6   RoW) |
|                              | Endless screw conveyor                  | 0.00002          | kWh  | 0.004            | kWh / t | Electricity mix (SUBLime designed) [10]                                |
|                              | <b>Hydrated lime (HL)</b>               | 0.25             | t    | 0.25             | t       | Laveglia et al, 2022 [10]                                              |
|                              | Transport                               | 25               | t*km | 100              | km      | Modelled by Ecoinvent (transport, lorry 16-32 metric ton, EURO6   RoW) |
|                              | Endless screw conveyor                  | 0.001            | kWh  | 0.004            | kWh / t | Electricity mix (SUBLime designed) [10]                                |
|                              | <b>Dry mixer</b>                        | 4                | kWh  | 4                | kWh / t | Electricity mix (SUBLime designed) [10]                                |
| Output                       | <b>Hydrated Lime Plaster (HLP)</b>      | 1.00             | t    | 1.00             | t       | Output of the Plaster Manufacturing                                    |

#### Supplementary Information 4 (SP4).

Design parameters of the carbon capture system (Aspen Hysys Simulation).

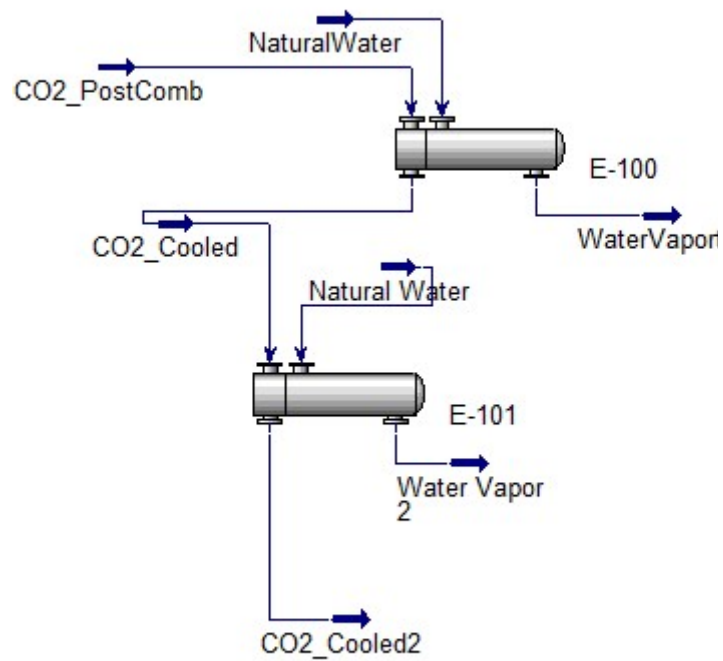

Tube Side Inlet:  Name:  Shell Side Inlet:

Tube Side Outlet:  Shell Side Outlet:

Tube Side Fluid Pkg:  Shell Side Fluid Pkg:



| Configuration                  |            | Calculated Information                       |            |
|--------------------------------|------------|----------------------------------------------|------------|
| Number of Shell Passes         | 7          | Shell HT Coeff [kJ/h-m <sup>2</sup> -C]      | <empty>    |
| Number of Shells in Series     | 7          | Tube HT Coeff [kJ/h-m <sup>2</sup> -C]       | <empty>    |
| Number of Shells in Parallel   | 7          | Overall U [kJ/h-m <sup>2</sup> -C]           | 24,69      |
| Tube Passes per Shell          | 2          | Overall UA [kJ/C-h]                          | 1564       |
| Exchanger Orientation          | Horizontal | Shell DP [kPa]                               | 2,500e-002 |
| First Tube Pass Flow Direction | Counter    | Tube DP [kPa]                                | 3,499e-002 |
| Elevation (Base)               | 0,0000     | Heat Trans. Area per Shell [m <sup>2</sup> ] | 63,33      |
|                                |            | Tube Volume per Shell [m <sup>3</sup> ]      | 0,1930     |
|                                |            | Shell Volume per Shell [m <sup>3</sup> ]     | 2,241      |
| TEMA Type                      | A E L      |                                              |            |

| Overall Performance |                 |
|---------------------|-----------------|
| Duty                | 6,163e+005 kJ/h |
| Heat Leak           | 0,000e-01 kJ/h  |
| Heat Loss           | 0,000e-01 kJ/h  |
| UA                  | 1,56e+03 kJ/C-h |
| Min. Approach       | 330,000 C       |
| LMTD                | 394,1 C         |

  

| Detailed Performance |               |
|----------------------|---------------|
| UA Curvature Error   | 0,0000 kJ/C-h |
| Hot Pinch Temp       | 350,0000 C    |
| Cold Pinch Temp      | 20,0000 C     |
| Ft Factor            | 0,823         |
| Uncorrected LMTD     | 478,887 C     |

The electricity consumption of the heat exchanger is based on the pumping power required for the shell side. The pump is designed considering the pumping of natural water, at 20°C for 200 kg/h (3.3 L/m). [https://www.kawamoto-global.com/web/data/ecatalog\\_u\\_pdf/2.pdf](https://www.kawamoto-global.com/web/data/ecatalog_u_pdf/2.pdf)

■ Specification table

50Hz

| Suction bore | Discharge bore | Ref. | Model        | Motor | Standard specifications |            |                     |            | Maximum back pressure | Vibration isolator application table |        |
|--------------|----------------|------|--------------|-------|-------------------------|------------|---------------------|------------|-----------------------|--------------------------------------|--------|
|              |                |      |              |       | Capacity                | Total head | Capacity            | Total head |                       |                                      |        |
| mm           | mm             |      |              | kW    | m <sup>3</sup> /min     | m          | m <sup>3</sup> /min | m          | MPa                   |                                      |        |
| 40           | 32             | 1    | GEI405CE0.75 | 0.75  | 0.05                    | 19.8       | 0.2                 | 14.5       | 0.77                  | PBKV-46-404-01                       | PX-60Z |
|              |                | 2    | GEI405CE1.5  | 1.5   | 0.05                    | 31         | 0.2                 | 24         | 0.62                  | PBKV-46-404-02                       | PX-60Z |
|              |                | 3    | GEI405CE2.2  | 2.2   | 0.05                    | 40         | 0.2                 | 33.5       | 0.58                  | PBKV-46-404-02                       | PX-60Z |
| 50           | 40             | 4    | GEH505CE0.75 | 0.75  | 0.1                     | 15.8       | 0.32                | 10.5       | 0.81                  | PBKV-46-404-01                       | PX-60Z |
|              |                | 5    | GEI505CE1.5  | 1.5   | 0.1                     | 22.5       | 0.32                | 17         | 0.75                  | PBKV-46-404-01                       | PX-60Z |
|              |                | 6    | GEI505CE2.2  | 2.2   | 0.1                     | 34.5       | 0.32                | 24         | 0.63                  | PBKV-46-404-02                       | PX-60Z |
|              |                | 7    | GEI505CE3.7  | 3.7   | 0.1                     | 45.5       | 0.32                | 36.5       | 0.53                  | QRE-01A                              | PX-60Z |
|              |                | 8    | GEK505CE5.5  | 5.5   | 0.1                     | 58         | 0.32                | 51         | 0.39                  | QRE-01A                              | PX-60Z |
| 65           | 50             | 9    | GEH655CE1.5  | 1.5   | 0.2                     | 15.8       | 0.63                | 10.5       | 0.81                  | PBKV-46-404-01                       | PX-60Z |
|              |                | 10   | GEI655CE2.2  | 2.2   | 0.2                     | 22.8       | 0.63                | 15.2       | 0.75                  | PBKV-46-404-02                       | PX-60Z |
|              |                | 11   | GEI655CE3.7  | 3.7   | 0.2                     | 32.5       | 0.63                | 21         | 0.65                  | QRE-01A                              | PX-60Z |
|              |                | 12   | GEK655CE5.5  | 5.5   | 0.2                     | 45         | 0.63                | 34         | 0.52                  | QRE-01A                              | PX-85Z |
|              |                | 13   | GEK655CE7.5  | 7.5   | 0.2                     | 54.5       | 0.63                | 43.5       | 0.42                  | QRE-01A                              | PX-85Z |
| 80           | 65             | 14   | GEI805CE3.7  | 3.7   | 0.4                     | 23         | 1.25                | 12         | 0.74                  | QRE-01A                              | PX-60Z |
|              |                | 15   | GEI805CE5.5  | 5.5   | 0.4                     | 30.5       | 1.25                | 20         | 0.66                  | QRE-01A                              | PX-85Z |
|              |                | 16   | GEI805CE7.5  | 7.5   | 0.4                     | 38.5       | 1.25                | 27.5       | 0.58                  | QRE-01A                              | PX-85Z |

**Supplementary Information 5 (SP5).**  
Life-cycle cost inventory (based on [8])

| <b>Group</b>                   | <b>Item</b>          | <b>Unit of measure</b>  | <b>Unit costs</b> |      |
|--------------------------------|----------------------|-------------------------|-------------------|------|
| <b>Purchase of Materials</b>   | <b>Binders</b>       | Hydrated Lime           | €/kg              | 0.11 |
|                                | <b>Aggregates</b>    | Sand                    | €/kg              | 0.01 |
|                                |                      | Pumice                  | €/kg              | 0.06 |
|                                |                      | Polystyrene             | €/kg              | 1.29 |
|                                | <b>Additives</b>     | Carboxymethyl cellulose | €/kg              | 0.97 |
|                                |                      | Alkylbenzene sulfonate  | €/kg              | 0.80 |
|                                |                      | Polycarboxyllate        | €/kg              | 0.65 |
|                                |                      | Ethylene vinyl acetate  | €/kg              | 1.12 |
| <b>Others</b>                  | Carbon tax           | €/kg                    | 0.09              |      |
| <b>Transportation</b>          | Truck transportation | €/t.km                  | 0.06              |      |
| <b>Electricity consumption</b> | Electricity          | €/kWh                   | 0.11              |      |
| <b>End of Life</b>             | Sanitary landfilling | €/kg                    | 0.02              |      |
